# Supplementary material for: Development of digital biomarkers for resting tremor and bradykinesia using a wrist-worn wearable device
Source: PubMed Central journal article supplement (PMC6962225; doi:10.1038/s41746-019-0217-7), 2020-01-15
Supplement: 41746_2019_217_MOESM1_ESM.pdf [file 41746_2019_217_MOESM1_ESM.pdf]

## Supplementary Information

**Supplementary Table 1.** Related work.

| Work             | Year | # Patients |          | Symptoms |              | Sensors                 | # Devices | Locations                                                            | Data Collection                                              | Criterion Validity | Discriminative Validity | Utility | Algorithm                                                                 |
|------------------|------|------------|----------|----------|--------------|-------------------------|-----------|----------------------------------------------------------------------|--------------------------------------------------------------|--------------------|-------------------------|---------|---------------------------------------------------------------------------|
|                  |      | PD         | Controls | Tremor   | Bradykinesia |                         |           |                                                                      |                                                              |                    |                         |         |                                                                           |
| Hoff et al.      | 2004 | 15         |          | Yes      | Yes          | Accelerometer           | 3         | Sternum, wrist and thigh on most affected side                       | 24 hour recording Motor diaries                              | No                 | Yes                     | No      | Heuristic algorithm based on empirically derived thresholds.              |
| Keijsers et al.  | 2006 | 23         |          | Yes      | Yes          | Accelerometer           | 6         | Both upper arms and upper legs, sternum, wrist on most affected side | 35 ADLs ~3hr monitoring period (ON/OFF)                      | No                 | Yes                     | No      | Heuristic algorithm based on empirically derived thresholds.              |
| Salarian et al.  | 2007 | 21         | 10       | Yes      | Yes          | Gyroscope               | 2         | Both wrists                                                          | 15 ADLs + alternating hand movement (right and left)         | Yes                | Yes                     | No      | Heuristic algorithm based on empirically derived thresholds.              |
| Zwartjes et al.  | 2010 | 6          | 7        | Yes      | Yes          | Accelerometer Gyroscope | 4         | Sternum, wrist, thigh and foot on the most affected side             | 8 ADLs + 5 motor assessment tasks                            | Yes                | Yes                     | No      | Heuristic algorithm based on empirically derived thresholds.              |
| Griffiths et al. | 2012 | 34         | 10       | No       | Yes          | Accelerometer           | 1         | Wrist on the most affected side                                      | ADLs and constrained motor tasks in lab Upto 10 days at home | Yes                | No                      | No      | Proprietary. Heuristic algorithm based on empirically derived thresholds. |

|                |      |                            |    |     |     |                            |   |                                        |                                                                                               |     |     |     |                                                                                                                       |
|----------------|------|----------------------------|----|-----|-----|----------------------------|---|----------------------------------------|-----------------------------------------------------------------------------------------------|-----|-----|-----|-----------------------------------------------------------------------------------------------------------------------|
| Rigas et al.   | 2012 | 18                         | 5  | Yes | No  | Accelerometer              | 6 | Both wrists and ankles, sternum, waist | 5 ADLs + 3 motor assessment tasks                                                             | Yes | No  | No  | Posture recognition and tremor severity estimation algorithm trained using machine learning (HMM).                    |
| Roy et al.     | 2013 | 19                         | 4  | Yes | No  | Accelerometer<br>EMG       | 4 | Both forearms and shanks               | Self selected ADLs                                                                            | Yes | No  | No  | Symptom detection algorithm trained using machine learning (DNN). MAP classifier for estimating severity of symptoms. |
| Tzallas et al. | 2014 | 24(in lab)<br>12 (at home) | 5  | Yes | Yes | Accelerometer<br>Gyroscope | 5 | Both wrists and ankles, waist          | Prescribed and self-selected ADLs<br>In lab: ~15 minutes/subject<br>At home: ~8 hours/subject | Yes | No  | Yes | Machine learning classifiers for assessment of tremor, bradykinesia and dyskinesia                                    |
| Horne et al.   | 2015 | 64                         | 38 | No  | Yes | Accelerometer              | 1 | Wrist on the most affected side        | Upto 10 days at home                                                                          | Yes | Yes | No  | Proprietary. Heuristic algorithm based on empirically derived thresholds (Griffiths et al. 2012).                     |

|                           |      |     |    |     |     |                            |   |                                           |                                                                                 |    |     |    |                                                                                                                                                                          |
|---------------------------|------|-----|----|-----|-----|----------------------------|---|-------------------------------------------|---------------------------------------------------------------------------------|----|-----|----|--------------------------------------------------------------------------------------------------------------------------------------------------------------------------|
| Braybrook et al.          | 2016 | 194 | 28 | Yes | No  | Accelerometer              | 1 | Wrist on the most affected side           |                                                                                 | No | Yes | No | Heuristic algorithm based on empirically derived thresholds.                                                                                                             |
| Pulliam et al.            | 2018 | 13  |    | Yes | Yes | Accelerometer<br>Gyroscope | 2 | Wrist and ankle on the most affected side | 6 ADLs (hygiene, eating, dressing, desk work, entertainment, laundry)<br>ON/OFF | No | Yes | No | Proprietary. Heuristic algorithm based on empirically derived thresholds.                                                                                                |
| Rodríguez-Molinero et al. | 2018 | 23  |    | No  | Yes | Accelerometer              | 1 | Waist                                     | 1 - 3 days at home<br>Motor diaries                                             | No | Yes | No | Machine learning classifier for gait detection. Heuristic algorithm for bradykinesia assessment based on movement fluidity during gait using patient specific threshold. |

**Supplementary Table 2.** List of activities performed in both PD and HC studies.

| <b>Scripted MDS-UPDRS-III Activities</b>         | <b>Activities of Daily Living</b>                                                                                                                           | <b>Controlled Speech Activities</b>                                                         |
|--------------------------------------------------|-------------------------------------------------------------------------------------------------------------------------------------------------------------|---------------------------------------------------------------------------------------------|
| (3.3) Rigidity (neck, wrist/elbow and hip/knee)  | (1) Tying a shoe                                                                                                                                            | (1) Conversation. Subject discusses things that excite him or her.                          |
| (3.4) Finger tapping (right and left)            | (2) Writing a sentence                                                                                                                                      | (2) Picture description. Subject discusses everything he or she sees in a provided picture. |
| (3.5) Hand movements (flexion/extension)         | (3) Writing cursive                                                                                                                                         | (3) Reverse counting. Subject counts backwards from 405 to 375 by 3's.                      |
| (3.6) Pronation-supination movements of hand     | (4) Fold a piece of paper                                                                                                                                   | (4) Reading. Subject reads an excerpt from a book.                                          |
| (3.7) Toe tapping                                | (5) Put on and remove jewelry                                                                                                                               | (5) Syllables. Subject repeats the word 'PATAKA' as many times as they can in 10 seconds.   |
| (3.8) Leg agility                                | (6) Use a remote control (press 507, 169, 746)                                                                                                              |                                                                                             |
| (3.9) Arising from chair (arms crossed and fast) | (7) Shake a bottle 5x, open bottle, drink, and close                                                                                                        |                                                                                             |
| (3.10) Gait: 2.5m and 10m                        | (8) Pour a cup of water, take a drink, return cup to table, take another drink                                                                              |                                                                                             |
| (3.12) Postural stability                        | (9) Eat with a spoon 2x                                                                                                                                     |                                                                                             |
| (3.13) Posture (eyes open/closed)                | (10) Take a lab coat off a hook/table, put it on, button all the buttons, then unbutton all the buttons, take off the lab coat and place back on hook/table |                                                                                             |
| (3.15) Postural tremor of the hands              | (11) Take a sweatshirt off a hook/table, put it on, zip up the zipper, then unzip the sweatshirt, take off the sweatshirt and place back on hook/table      |                                                                                             |

|                                                     |                                                                                                       |  |
|-----------------------------------------------------|-------------------------------------------------------------------------------------------------------|--|
| (3.16) Kinetic tremor of the hands (finger to nose) | (12) Open and close a door                                                                            |  |
| (3.17) Rest tremor                                  | (13) Carry a book out and back 10m and place on table                                                 |  |
|                                                     | (14) Carry a suitcase out and back 10m, then hold suitcase for 90 seconds with forearm at 90 degrees. |  |

**Supplementary Table 3.** Features extracted for training the tremor and gait classifiers. For each classifier, a checkmark (✓) indicates that the feature was extracted and an asterisk (\*) indicates that the feature survived after the feature selection step.

| Feature                 | Description                                                                                                                                                                                                                                                                                        | Tremor Classifier | Gait Classifier |
|-------------------------|----------------------------------------------------------------------------------------------------------------------------------------------------------------------------------------------------------------------------------------------------------------------------------------------------|-------------------|-----------------|
| Root mean square value  | Root mean square value of a sensor data in a given time window. The RMS value is a measure of signal energy. Value of signal energy feature for accelerometer data is correlated with amount and intensity of motion.                                                                              | ✓*                | ✓*              |
| Signal range            | Range of signal values. Signal range provides a measure of the extremes of motion observed in a given time window of sensor data. Higher range would indicate occurrence of a large excursion in sensor values.                                                                                    | ✓*                | ✓*              |
| Signal entropy          | Signal entropy is calculated by estimating Shannon entropy of the probability mass function of a signal <sup>32</sup> . Signal entropy values close to zero indicate that the signal is periodic and smooth, whereas large negative values indicate that the signal is irregular and non-periodic. | ✓*                | ✓*              |
| Correlation coefficient | Cross-correlation coefficient of data from 2 sensor streams (e.g. X axis and Y axis). The cross-correlation coefficient captures degree of co-ordination in the motion between orthogonal directions. Higher values                                                                                |                   | ✓*              |

|                              |                                                                                                                                                                                                                                                                                                         |    |    |
|------------------------------|---------------------------------------------------------------------------------------------------------------------------------------------------------------------------------------------------------------------------------------------------------------------------------------------------------|----|----|
|                              | indicate synchronous changes occurring between the two input signals.                                                                                                                                                                                                                                   |    |    |
| IQR of auto-covariance       | Interquartile range of auto-covariance is a measure of long-range dependency or periodicity of a signal. Range of auto-covariance captures if the signal is periodic or irregular.                                                                                                                      |    | ✓  |
| Mean cross rate              | Number of times signal changed from positive to negative normalized by total signal length.                                                                                                                                                                                                             |    | ✓* |
| Range count percentage       | Counts of observed time signal is between a given range (percentage).                                                                                                                                                                                                                                   |    | ✓  |
| Dominant frequency           | Value of the frequency with the highest magnitude in the normalized power spectrum of the accelerometer signal. Dominant frequency value captures the fundamental frequency of the underlying movement (e.g. tremor, walking) producing the acceleration signal.                                        | ✓* | ✓* |
| Dominant frequency magnitude | Magnitude of the dominant frequency in the normalized power spectrum. This feature captures the percentage of total signal energy in the dominant frequency. High values indicate that most of the signal energy is concentrated in the dominant frequency and low values indicate the signal energy is | ✓  | ✓* |

|                                                              |                                                                                                                                                                                                                                                                                                                        |    |    |
|--------------------------------------------------------------|------------------------------------------------------------------------------------------------------------------------------------------------------------------------------------------------------------------------------------------------------------------------------------------------------------------------|----|----|
|                                                              | spread across the different frequencies in the power spectrum.                                                                                                                                                                                                                                                         |    |    |
| Ratio of dominant frequency band to total energy in spectrum | Ratio of the energy in the dominant frequency component to the sum of energy in the entire frequency spectrum of a signal. This feature captures periodicity of a signal by calculating the ratio of the energy in the dominant frequency component to the sum of energy in the entire frequency spectrum of a signal. | ✓  | ✓  |
| Spectral flatness                                            | Spectral flatness is calculated by dividing the geometric mean of the power spectrum with the arithmetic mean. Spectral flatness captures the amount of modulation or the level of consistency and ranges from 0 to 1.                                                                                                 | ✓* | ✓* |
| Spectral entropy <sup>33</sup>                               | Spectral entropy is calculated by estimating Shannon entropy of the probability mass function of the power spectrum of a signal. Values closer to 1 indicate presence of white noise. Values closer to 0 indicate presence of periodicity in the signal.                                                               | ✓* | ✓* |
